# Supplementary material for: Loss of collagenase-2 confers increased skin tumor susceptibility to male mice
Source: Springer Nature journal article supplement (doi:10.1038/ng1249), 2003-09-28
Supplement: 41588_2003_BFng1249_MOESM1_ESM.pdf [file 41588_2003_BFng1249_MOESM1_ESM.pdf]

**a**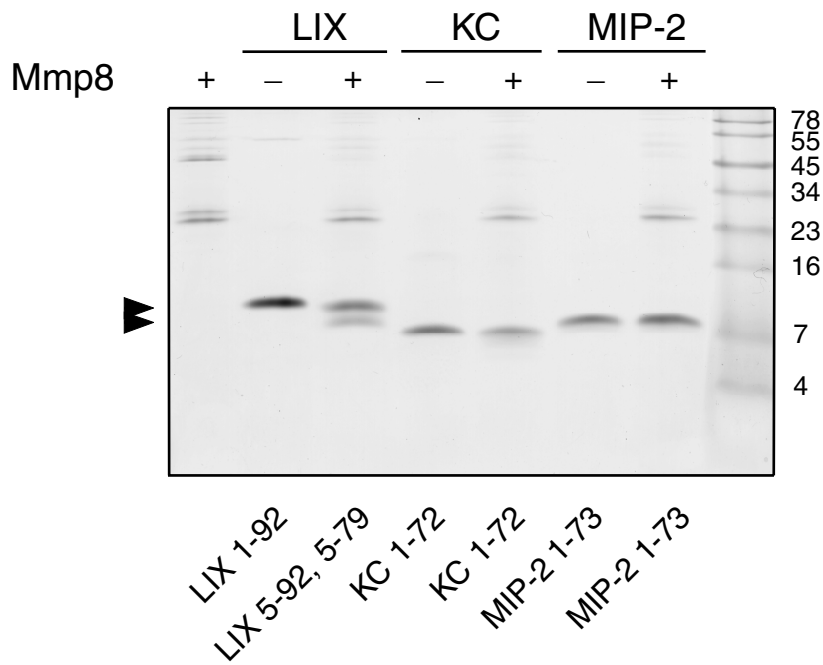

|            | Mass (Da) | N-terminal amino acid sequence |             |
|------------|-----------|--------------------------------|-------------|
|            | Measured  | Predicted                      |             |
| LIX 1-92   | 9,851     | 9,852.8                        | A-P-S-S-V-I |
| LIX 5-92   | 9,512     | 9,510.4                        | V-I-A-A-T-E |
| LIX 5-79   | 8,111     | 8,113.8                        | V-I-A-A-T-E |
| KC 1-72    | 8,041     | 8,042.5                        | A-P-I-A-N-E |
| MIP-2 1-73 | 7,848     | 7,849.2                        | n.d.        |

LIX (1-92)

<sup>1</sup>A-P-S-S-V-I-A-A-T-E-L-R-C-V-C<sup>15</sup>.....<sup>78</sup>A-K-R-N-A-L-A-V-E-R-T-A-S-V-Q<sup>92</sup>
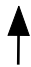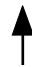**b**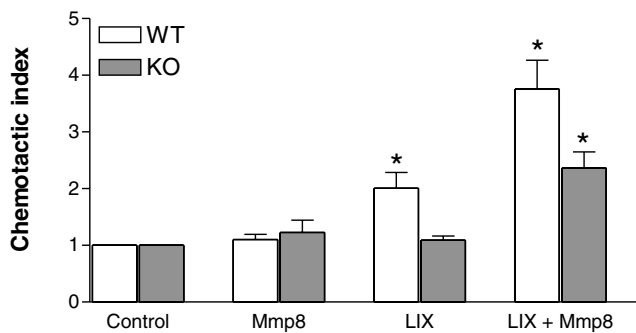**c**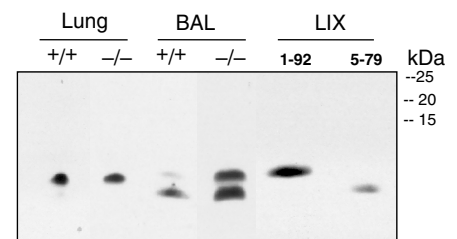

**Supplementary Figure 1.** Mmp8 processing of murine CXC chemokines. **a**, Chemokines (1  $\mu\text{g}$ ) were incubated with Mmp8 (200 ng) at 37°C for 16 h and the products were visualized by Tris-Tricine gel analysis. The processed forms of LIX are indicated by the *arrow heads*. Molecular weights of the chemokines were determined by electrospray ionization mass spectrometry. The cleaved scissile bonds of LIX identified by Edman N-terminal sequencing are indicated by *arrows*. The NH<sub>2</sub>-terminal ELR and CXC motifs are underlined. **b**, Chemotactic activity of wild-type *vs* *Mmp8*<sup>-/-</sup> neutrophils in response to LIX. Peripheral white blood cells from wild-type mice (*white bars*) and *Mmp8*<sup>-/-</sup> (*black bars*) were placed in the upper wells of migration chambers. LIX (500 ng/ml), LIX pretreated for 3 h at 37°C with rodent Mmp8 (500 and 50 ng/ml respectively) or Mmp8 alone (50 ng/ml) were placed in the lower wells. Chemotactic index values ( $\pm$  s.e.m.) are derived from six independent experiments (in triplicated wells). Statistical analyses were performed with the Mann-Whitney *U* test. \* represents  $p < 0.05$  LIX-treated *vs* control. **c**, Protein extracts from lungs and bronchoalveolar lavage (BAL) fluid of mice treated with LPS for 16 h (n=3 mice per genotype) were analyzed by Western-blot with antibodies against murine LIX. Synthetic polypeptides corresponding to full-length (1-92) and processed (5-79) forms of LIX were used as controls (1 ng / well).
